# Supplementary material for: Glucose and cholesterol induce abnormal cell divisions via DAF-12 and MPK-1 in C. elegans
Source: publisher site journal article supplement (doi:10.18632/aging.103647), 2020-08-18
Supplement: Supplementary file [file aging-v12i16-103647-supplementary-material-SD2.pdf]

## SUPPLEMENTARY TABLE

Supplementary Table 1. Survival data.

|                            | mean±SE        | P vs wildtype        | P vs <i>daf-18</i>          |
|----------------------------|----------------|----------------------|-----------------------------|
| wildtype                   | 13.68±0.87     |                      |                             |
| <i>daf-18</i>              | 3.01±1.06      | <0.001               |                             |
| <i>daf-18</i> +Glucose     | 8.75±0.23      | <0.001               | <0.001                      |
|                            | <b>mean±SE</b> | <b>P vs wildtype</b> | <b>P vs <i>daf-18</i></b>   |
| wildtype                   | 14.25±0.41     |                      |                             |
| <i>daf-18</i>              | 3.01±1.06      | <0.001               |                             |
| <i>daf-18</i> +Trehalose   | 7.13±1.09      | <0.001               | <0.001                      |
|                            | <b>mean±SE</b> | <b>P vs wildtype</b> | <b>P vs <i>ins-6 oe</i></b> |
| wildtype                   | 13.98±0.25     |                      |                             |
| <i>ins-6 oe</i>            | 5.01±0.16      | <0.001               |                             |
| <i>ins-6 oe</i> +Glucose   | 9.38±1.08      | <0.001               | <0.001                      |
|                            | <b>mean±SE</b> | <b>P vs wildtype</b> | <b>P vs <i>ins-6 oe</i></b> |
| wildtype                   | 13.79±1.03     |                      |                             |
| <i>ins-6 oe</i>            | 5.01±0.16      | <0.001               |                             |
| <i>ins-6 oe</i> +Trehalose | 8.05±0.68      | <0.001               | <0.001                      |
|                            | <b>mean±SE</b> | <b>P vs wildtype</b> |                             |
| wildtype                   | 14.02±0.65     |                      |                             |
| Cholesterol                | 17.0±0.45      | <0.001               |                             |
| Dafachronic acid           | 15.84±1.01     | <0.001               |                             |
|                            | <b>mean±SE</b> | <b>P vs wildtype</b> |                             |
| wildtype                   | 14.56±0.89     |                      |                             |
| F0                         | 11.35±0.54     | <0.01                |                             |
| F0                         | 12.97±0.14     | <0.01                |                             |
| F1                         | 14.67±1.05     | #                    |                             |
| F1                         | 14.35±0.15     | #                    |                             |
|                            | <b>mean±SE</b> | <b>P vs wildtype</b> |                             |
| wildtype                   | 14.01±0.25     |                      |                             |
| <i>gsy-1 RNAi</i>          | 13.78±1.11     | #                    |                             |

Survival of these worms was checked every day, and the mean survival rate was calculated using the Kaplan-Meier method, and any significant difference in overall survival rates was determined using the log-rank test (P value). #: no significant difference. Glucose: 20 mg/mL, Cholesterol: 1 mg/mL,  $\Delta$ 7-dafachronic acid: 1  $\mu$ g/ mL, Trehalose: 15 mg/mL.
